# Supplementary material for: Synthesis of silver nanoparticles using reducing agents obtained from natural sources (Rumex hymenosepalus extracts)
Source: PubMed Central journal article supplement (PMC3716778; doi:10.1186/1556-276x-8-318), 2013-07-10
Supplement: 1556-276X-8-318-S1.pdf [file 1556-276X-8-318-S1.pdf]

## Additional File 1

### Synthesis of Silver Nanoparticles using reducing agents from Natural Sources

#### (*Rumex hymenosepalus* extracts)

By Ericka Rodríguez-León et al

In this section we present more detail on some experimental results discussed in the main manuscript.

#### I. Picture of dried roots of *Rumex hymenosepalus*

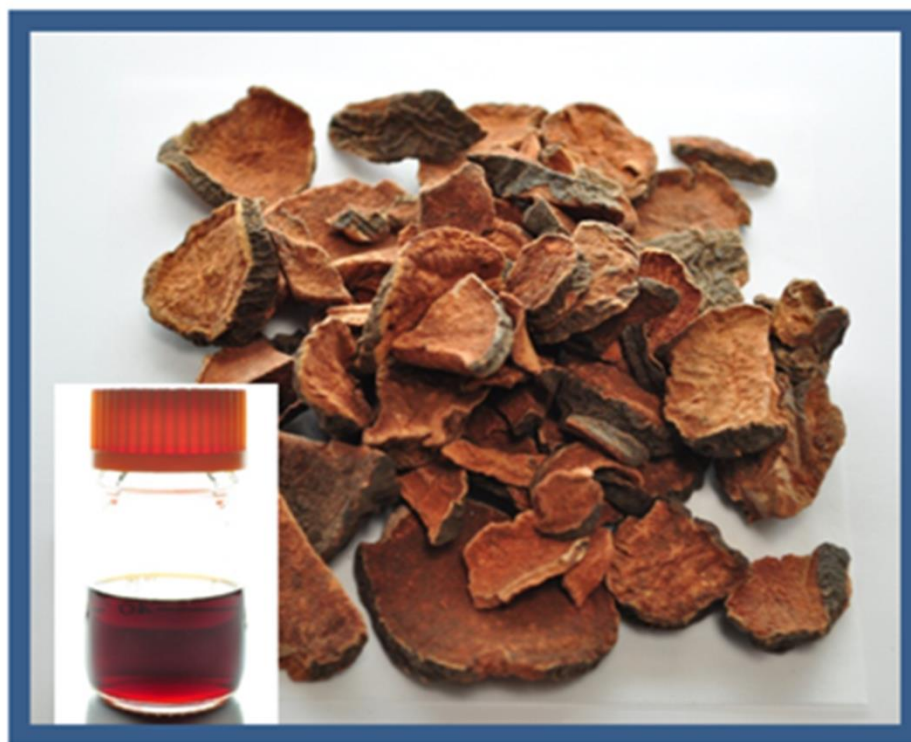

**Figure S1.- Dried Roots of *Rumex hymenosepalus*.** On inset extract solution of Rh after filtration.

In particular, we display some  $^1\text{H}$  NMR spectra and the EDS results, as well as a table with the NMR chemical shifts and the chemical structures of the found polyphenol molecules. In the following, Rh stands for *Rumex hymenosepalus*.

## II. $^1\text{H}$ NMR results

Figures 2, 3 and 4 display the  $^1\text{H}$  NMR spectrum of the Rh extract. Figure S2 is the full spectrum while figures S3 and S4 are sections of it. The observed chemical shifts correspond to polyphenol molecules, as shown in Table S1.

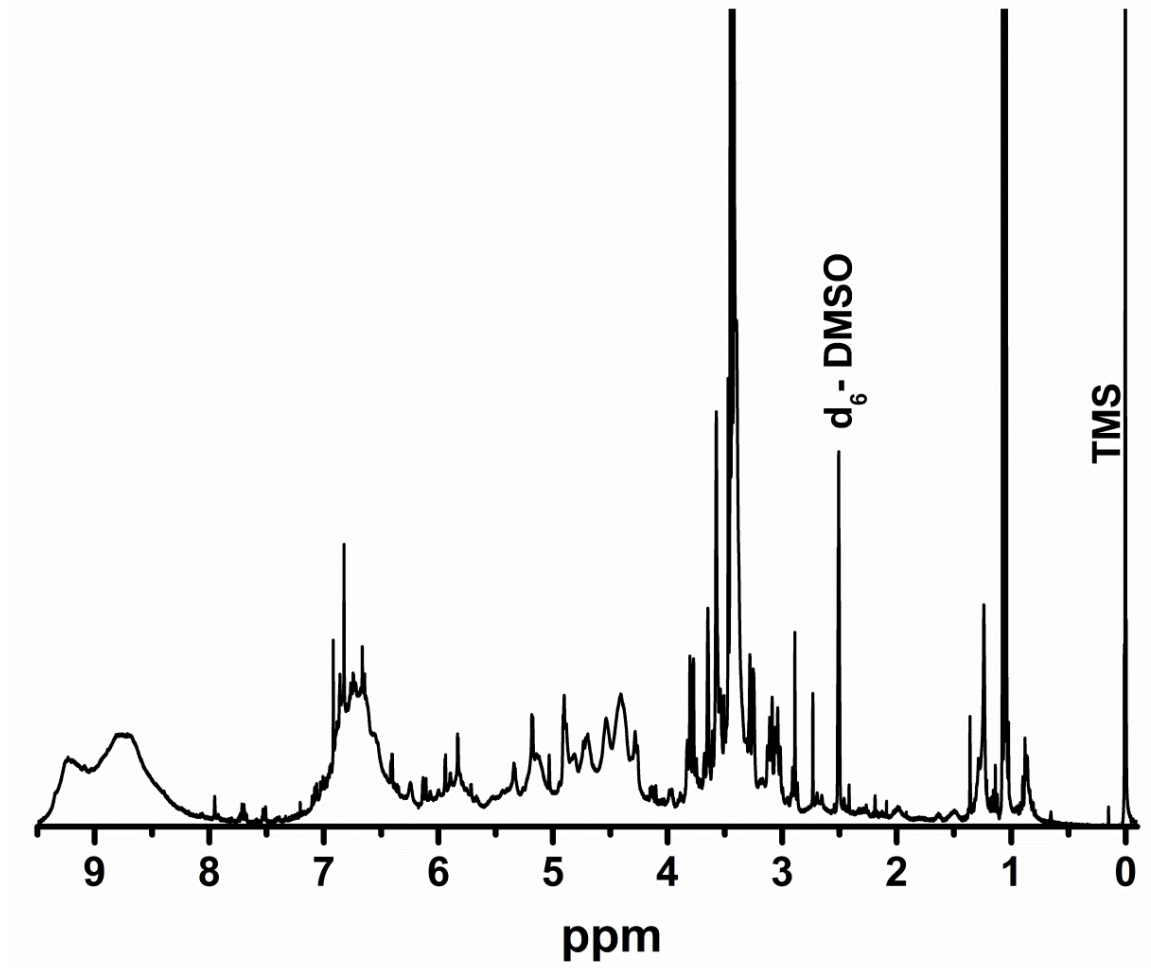

Figure S2.-  $^1\text{H}$  NMR spectra of Rh in  $\text{DMSO}-d_6$  referenced to TMS.

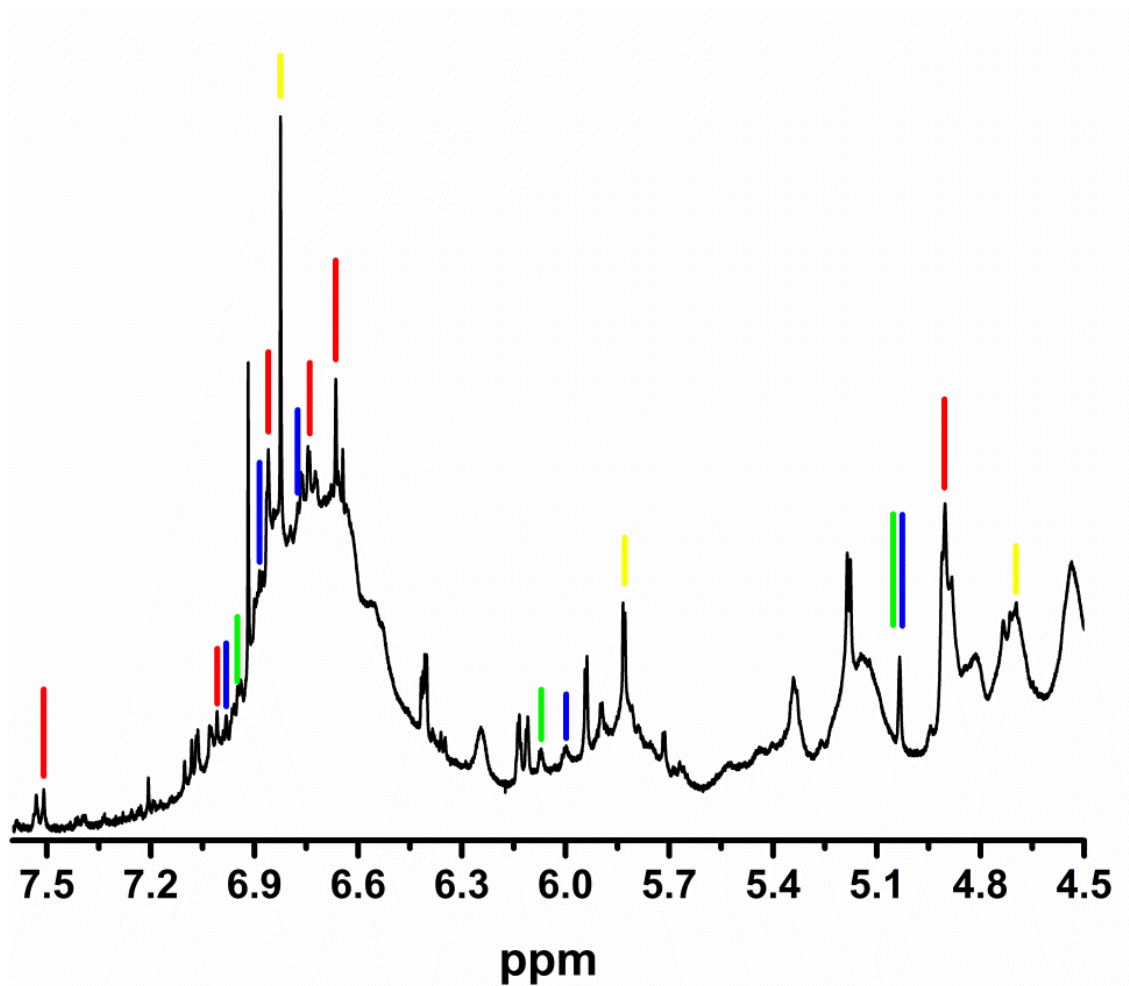

**Figure S3.- Section of the  $^1\text{H}$  NMR spectra of the Rh extract.** The colored lines in the chemical shifts correspond to polyphenol molecules: stilbene glycoside (red), epicatechin (yellow), epicatechin gallate (blue) and epigallocatechin gallate (green).

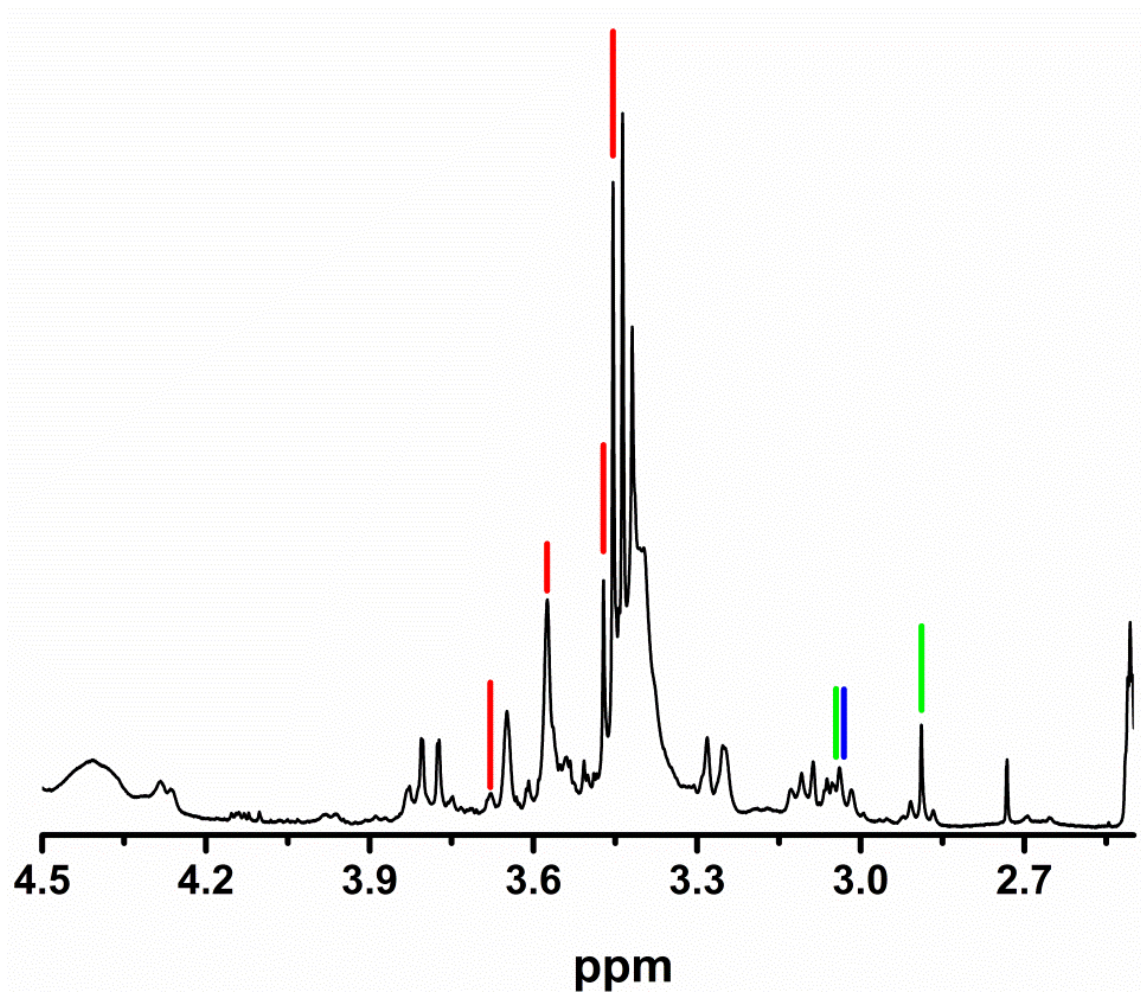

**Figure S4.-** Following section of the  $^1\text{H}$  NMR spectra of the Rh extract. The colored lines in the chemical shifts correspond to polyphenol molecules: stilbene glycoside (red), epicatechin gallate (blue) and epigallocatechin gallate (green).

In Table S1 we display the observed chemical shifts in the Rh extract, and compare them to those of different polyphenol molecules reported in the literature: stilbene glycoside [1], epicatechin (EC) [3], epicatechin gallate (ECG) [2] and epigallocatechin gallate (EGCG) [2]. Reference [3] is the web page of Spectral Database for Organic Compounds, SDBS. Note that the agreement is remarkably good.

| Chemical Shift extract | Stilbene Glycoside [1] | EGCG [2] | ECG [2] | EC [3] |
|------------------------|------------------------|----------|---------|--------|
| 7.50                   | 7.49                   |          |         |        |
| 7.00                   | 6.99                   |          |         |        |
| 6.98                   |                        |          | 6.99    |        |
| 6.94                   |                        | 6.95     |         |        |
| 6.88                   |                        |          | 6.88    |        |
| 6.86                   | 6.85                   |          |         |        |
| 6.82                   |                        |          |         | 6.821  |
| 6.77                   |                        |          | 6.78    |        |
| 6.74                   | 6.74                   |          |         |        |
| 6.66                   | 6.66                   |          |         |        |
| 6.07                   |                        | 6.03     | 6.03    |        |
| 5.82                   |                        |          |         | 5.821  |
| 5.03                   |                        | 5.03     | 5.09    |        |
| 4.90                   | 4.90                   |          |         |        |
| 4.73                   | 4.75                   |          |         |        |
| 4.69                   |                        |          |         | 4.66   |
| 3.92                   |                        |          |         | 3.928  |
| 3.90                   | 3.90                   |          |         |        |
| 3.71                   | 3.71                   |          |         |        |
| 3.68                   | 3.68                   |          |         |        |
| 3.57                   | 3.58                   |          |         |        |
| 3.56                   | 3.56                   |          |         |        |
| 3.47                   | 3.46                   |          |         |        |
| 3.43                   | 3.44                   |          |         |        |

|      |      |      |      |     |
|------|------|------|------|-----|
| 3.03 |      | 3.03 | 3.03 |     |
| 2.88 |      | 2.89 |      |     |
| 2.41 |      |      |      | 2.4 |
| 1.21 | 1.22 |      |      |     |

**Table S1.-  $^1\text{H}$  NMR chemical shifts for the Rh extract (first column) as compared to those reported in the literature for stilbene glycoside, epigallocatechin gallate (EGCG), epicatechin gallate (ECG) and epicatechin (EC).**

### III. Polyphenol molecular structures

In figures S5 and S6 we present the chemical structures of some of the molecules present in the Rh extract.

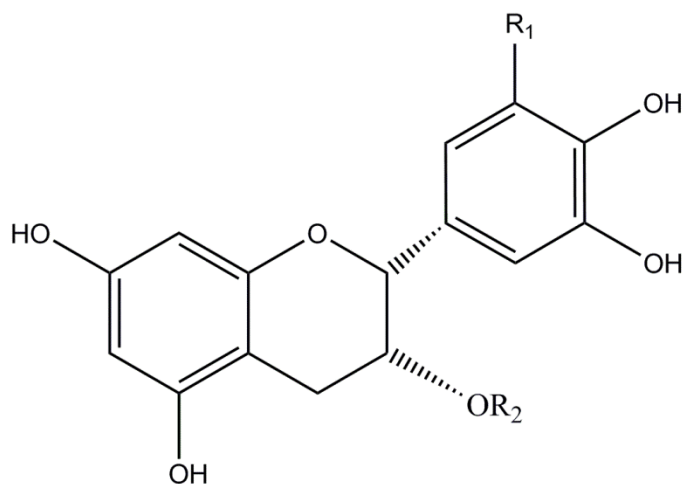

ec,  $R_1=H$ ,  $R_2=H$

ecg,  $R_1=H$ ,  $R_2=\text{gallate}$

egcg,  $R_1=OH$ ,  $R_2=\text{gallate}$

gallate=

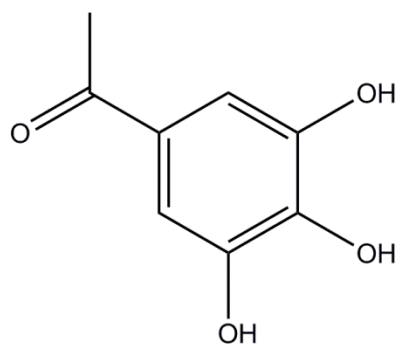

**Figure S5.- Molecular structure of the catechin compounds found in the Rh extract.**

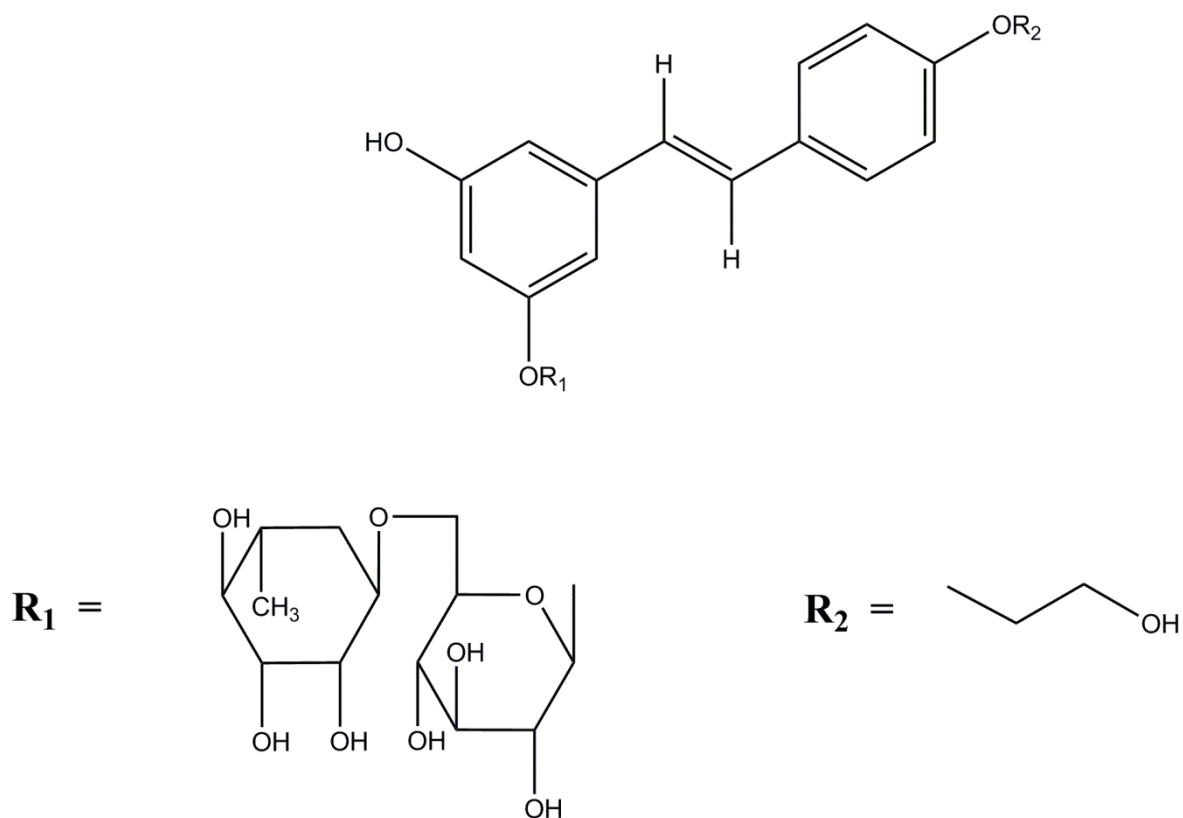

**Figure S6.-** Molecular structure of stilbene glycoside found in the Rh extract. This molecule has also been found in the *Terminalia sericeae* tree.

IV. Negative control using solutions of AgNO<sub>3</sub> and ethanol without Rh extract.

| <i>Sample</i> | <i>Vol. AgNO<sub>3</sub> 0.1M</i> | <i>Vol. Sol. 70:30 v/v EtOH/Water</i> | <i>Vol. EtOH</i> |
|---------------|-----------------------------------|---------------------------------------|------------------|
| <b>SA</b>     | 100 μL                            | 200 μL                                | 3700 μL          |
| <b>SB</b>     | 600 μL                            | 200 μL                                | 3200 μL          |

**Table S2.-** Composition of samples without Rh extract.



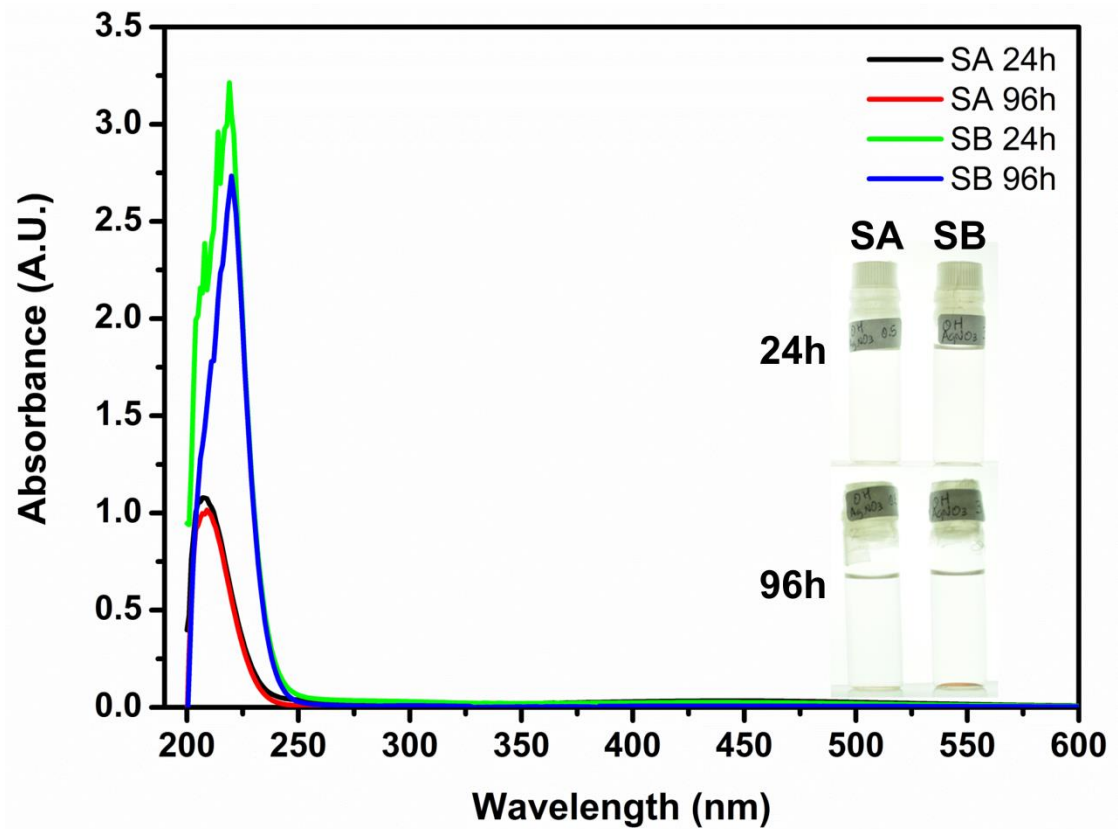

Figure S7.- UV-Vis spectrum of solutions without Rh extract. This is the negative control for the synthesis of silver nanoparticles.

V. Negative control for abiotic synthesis of silver nanoparticles

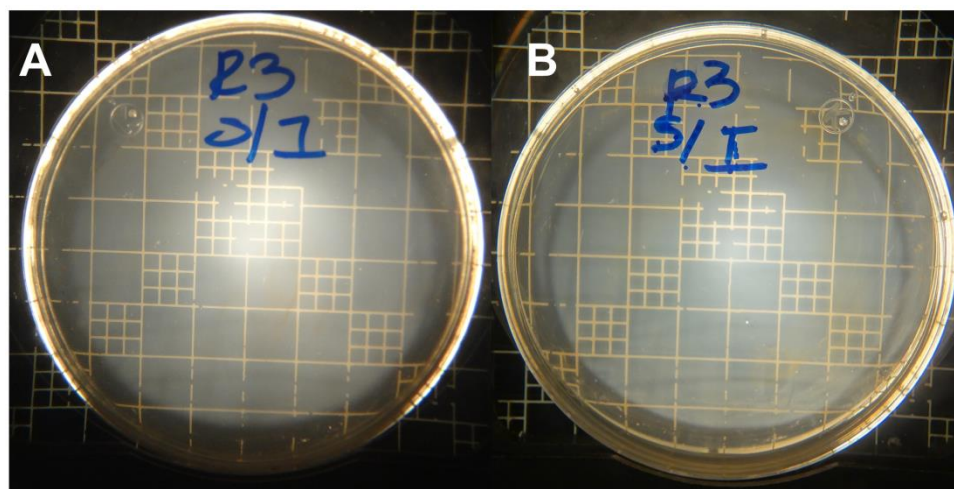

Figure S8.- Sterility test of A) aerobic mesophilic bacteria and B) mold and yeast. Both samples are free of microorganisms.

## VI. Energy Dispersive X-Ray spectroscopy (EDS) results

Figure S9 and Table S3 show the EDS results.

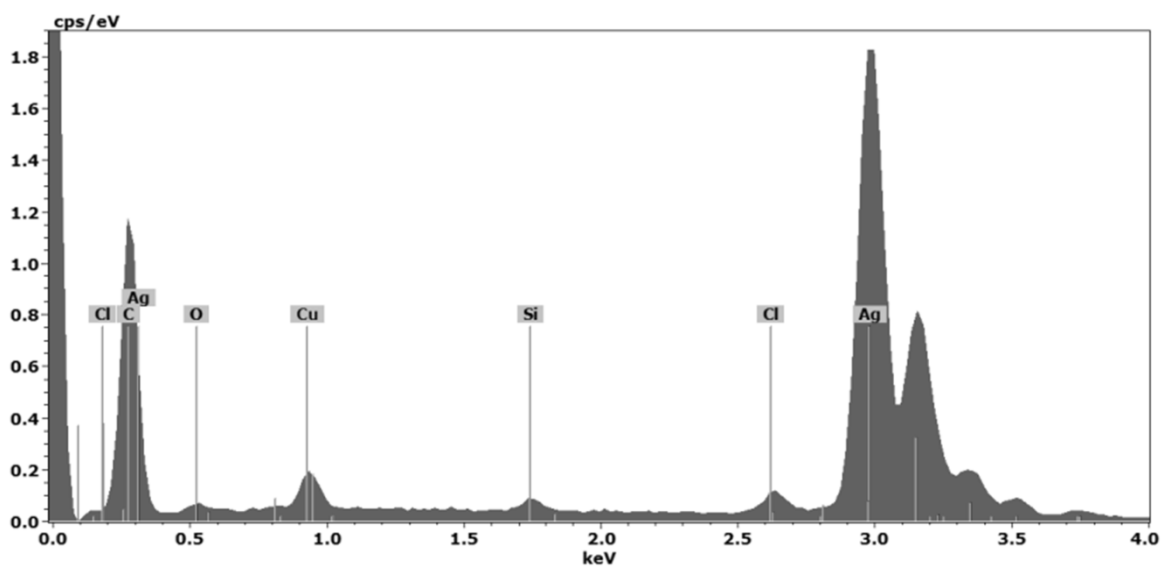

**Figure S9.- EDS spectra for a silver nanoparticle.** Note the peaks corresponding to silver.

| E1 | AN | Series   | unn. C [wt. %] | Norm. C [wt. %] | Atom C [at. %] | Error (1 Sigma) [wt. %] |
|----|----|----------|----------------|-----------------|----------------|-------------------------|
| Ag | 47 | K-series | 99.05          | 99.05           | 96.88          | 3.30                    |
| K  | 19 | K-series | 0.66           | 0.66            | 1.78           | 0.06                    |
| O  | 8  | K-series | 0.11           | 0.11            | 0.73           | 0.04                    |
| S  | 16 | K-series | 0.17           | 0.17            | 0.56           | 0.04                    |
| Mg | 12 | K-series | 0.01           | 0.01            | 0.04           | 0.03                    |
| C  | 6  | K-series | 0.00           | 0.00            | 0.00           | 0.00                    |
| Si | 14 | K-series | 0.00           | 0.00            | 0.00           | 0.00                    |
| Cl | 17 | K-series | 0.00           | 0.00            | 0.00           | 0.00                    |
| Cu | 29 | K-series | 0.00           | 0.00            | 0.00           | 0.00                    |
| N  | 7  | K-series | 0.00           | 0.00            | 0.00           | 0.00                    |
|    |    | Total:   | 100.00         | 100.00          | 100.00         |                         |

**Table S3.- Chemical analysis of the EDS results for a silver nanoparticle.** The particle is mainly composed of silver (96.88%) but trace amounts of other elements are also present. These elements are often found in plant extracts.

### References

1. Joseph CC, Moshi MJ, Innocent E, and Nkunya MHH: **Isolation of a Stilbene Glycoside and other Constituents of Terminalia sericeae.** Afr J Tradit Complementary and Alternative Medicine 2007, 4: 383–386.
2. Sivaraman SK, Elango I, Kumar S and Santhanam V: **A green protocol for room temperature synthesis of silver nanoparticles in seconds.** Current Science 2009, 97:1055-1059.
3. [http://sdb.sriodb.aist.go.jp/sdb/cgi-bin/cre\\_index.cgi](http://sdb.sriodb.aist.go.jp/sdb/cgi-bin/cre_index.cgi)
